# Supplementary material for: Limonin Derivatives via Hydrogenation: Structural Identification and Anti-Inflammatory Activity Evaluation
Source: MDPI journal article supplement (doi:10.3390/app122111169), 2022-11-04
Supplement: s1 [file s1]

# Supplementary Materials

## **Limonin derivatives via hydrogenation: Structural identification and anti-inflammatory activity**

Jingguo Yang<sup>1</sup>, Yuhong Hu<sup>1,2</sup>, Jing Wang<sup>1</sup>, Kuan Chang<sup>1</sup>(✉)

1 International Joint Research Center for Photo-responsive Molecules and Materials,  
School of Chemical and Material Engineering, Jiangnan University, Wuxi 214122,  
China

2 Quzhou Zhanhong Biotechnology Co., Ltd., Quzhou 324000, China

\* Correspondence: changkuan@jiangnan.edu.cn

# 1. Spectrum information of compounds **2-8**

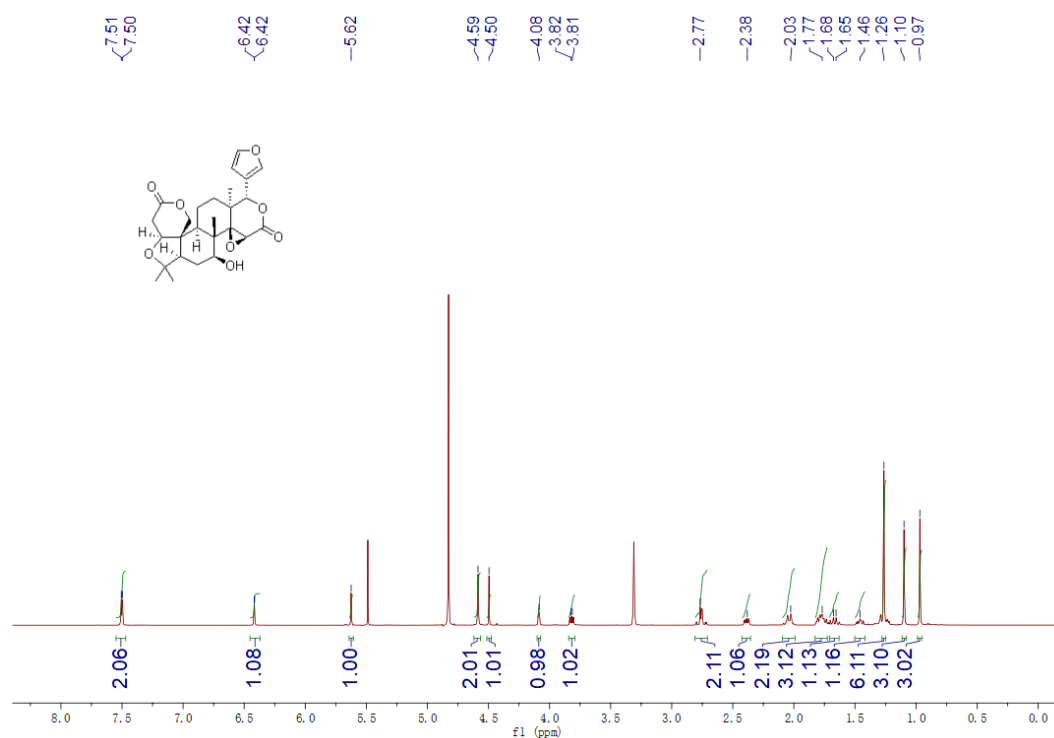

Figure S1:  $^1\text{H}$  NMR spectrum (400 MHz) of **2** in  $\text{CD}_3\text{OD}$

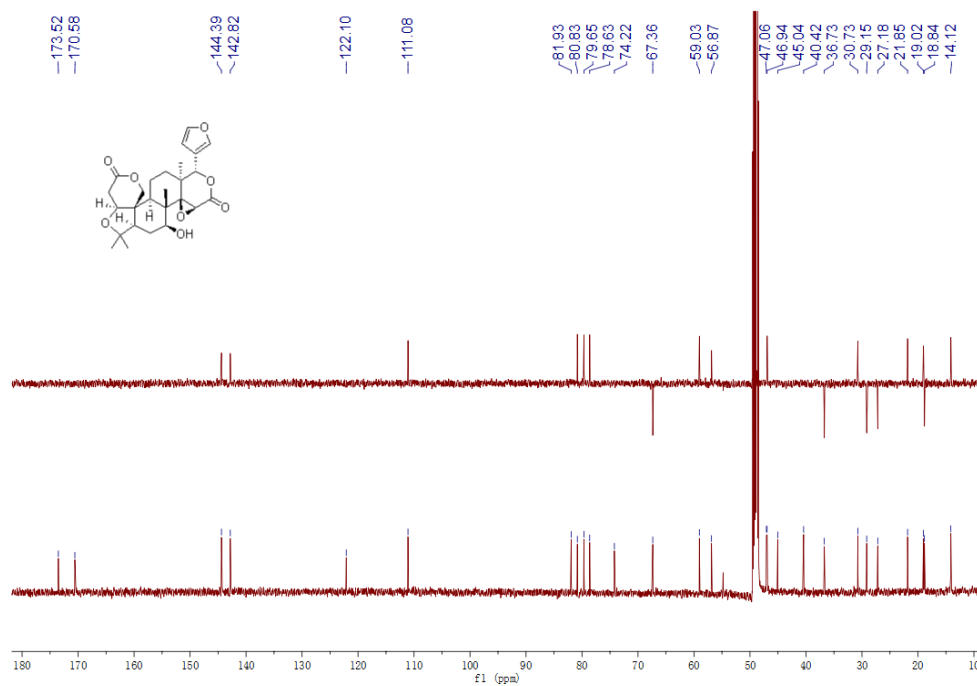

Figure S2:  $^{13}\text{C}$  NMR spectrum (125 MHz) of **2** in  $\text{CD}_3\text{OD}$

## Qualitative Analysis Report

|                        |                                        |                               |                             |
|------------------------|----------------------------------------|-------------------------------|-----------------------------|
| <b>Data Filename</b>   | ESI_H_20200426_GYW_LJ_15.d             | <b>Sample Name</b>            | S0409-1                     |
| <b>Sample Type</b>     | Sample                                 | <b>Position</b>               | P1-A9                       |
| <b>Instrument Name</b> | Agilent G6520 Q-TOF                    | <b>Acq Method</b>             | 20160322_MS_ESIH_POS_1min.m |
| <b>Acquired Time</b>   | 4/26/2020 18:46:11                     | <b>IRM Calibration Status</b> | Success                     |
| <b>DA Method</b>       | small molecular data analysis method.m | <b>Comment</b>                | ESIH by ZZY                 |

### User Spectra

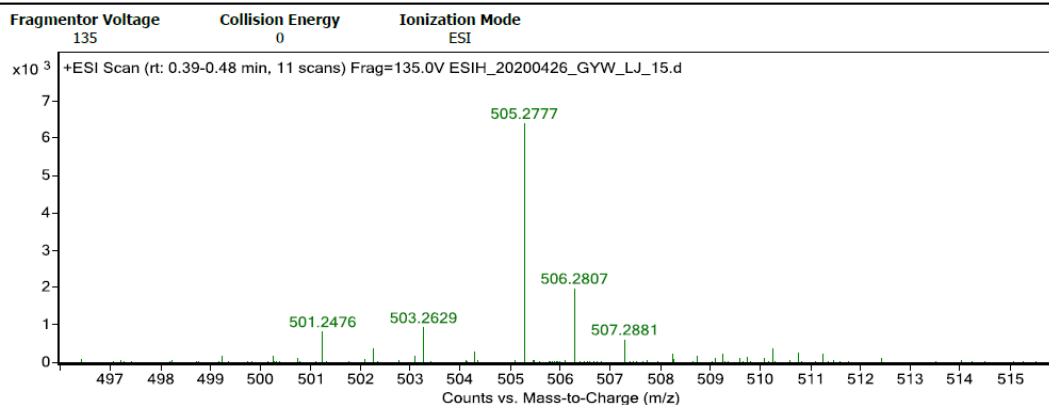

### Formula Calculator Results

| m/z      | Calc m/z | Diff (mDa) | Diff (ppm) | Ion Formula                                      | Ion                 |
|----------|----------|------------|------------|--------------------------------------------------|---------------------|
| 505.2777 | 505.2772 | -0.55      | -1.08      | C <sub>26</sub> H <sub>42</sub> NaO <sub>8</sub> | (M+Na) <sup>+</sup> |

--- End Of Report ---

Figure S3: HR-ESI-MS spectrum of compound **3**

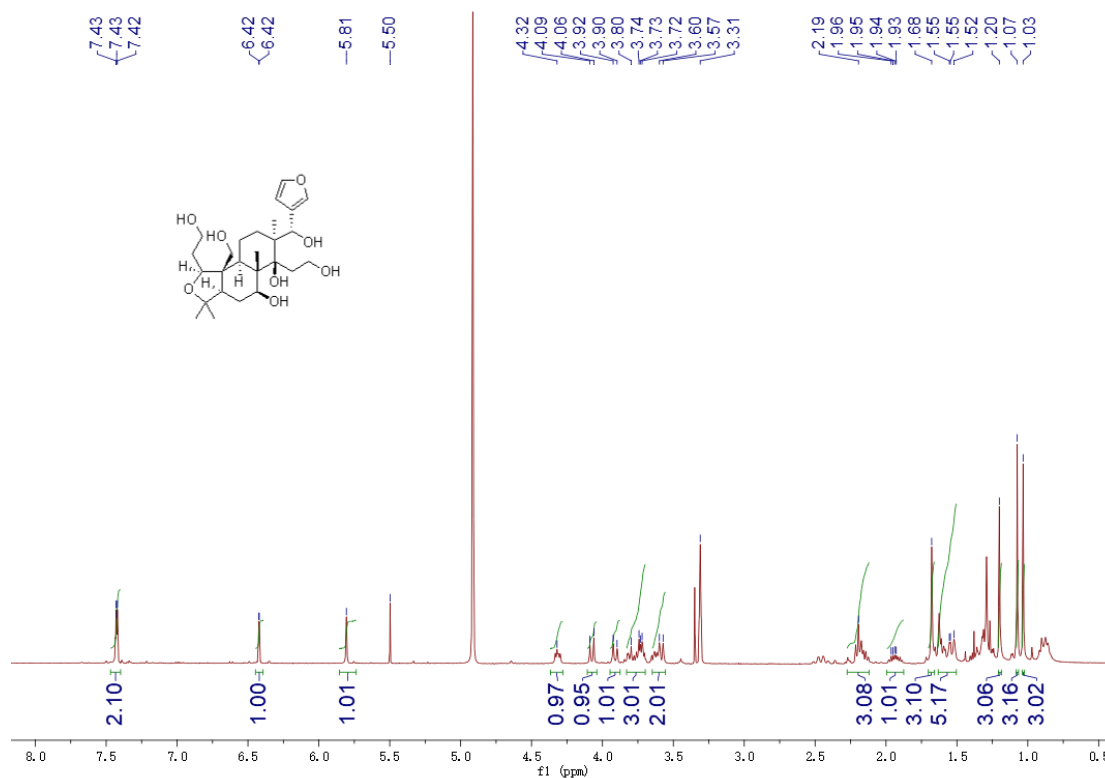

Figure S4: <sup>1</sup>H NMR spectrum (400 MHz) of **3** in CD<sub>3</sub>OD.

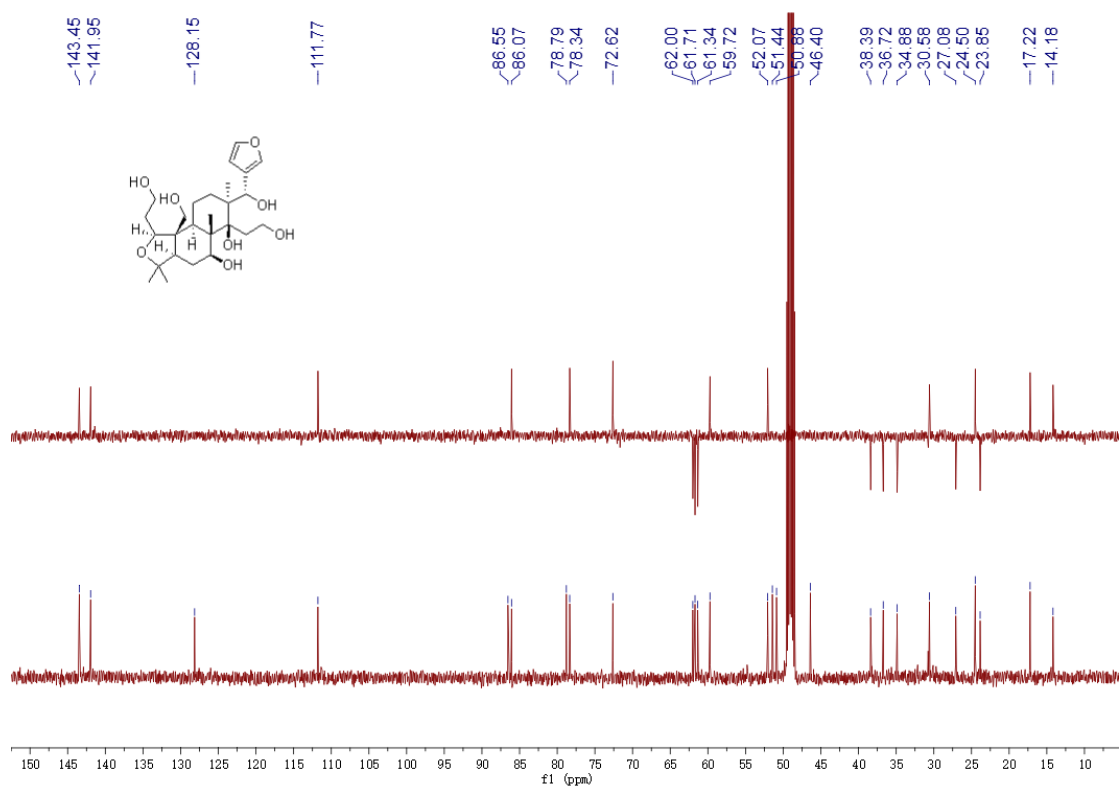

Figure S5:  $^{13}\text{C}$  NMR spectrum (125 MHz) of **3** in  $\text{CD}_3\text{OD}$ .

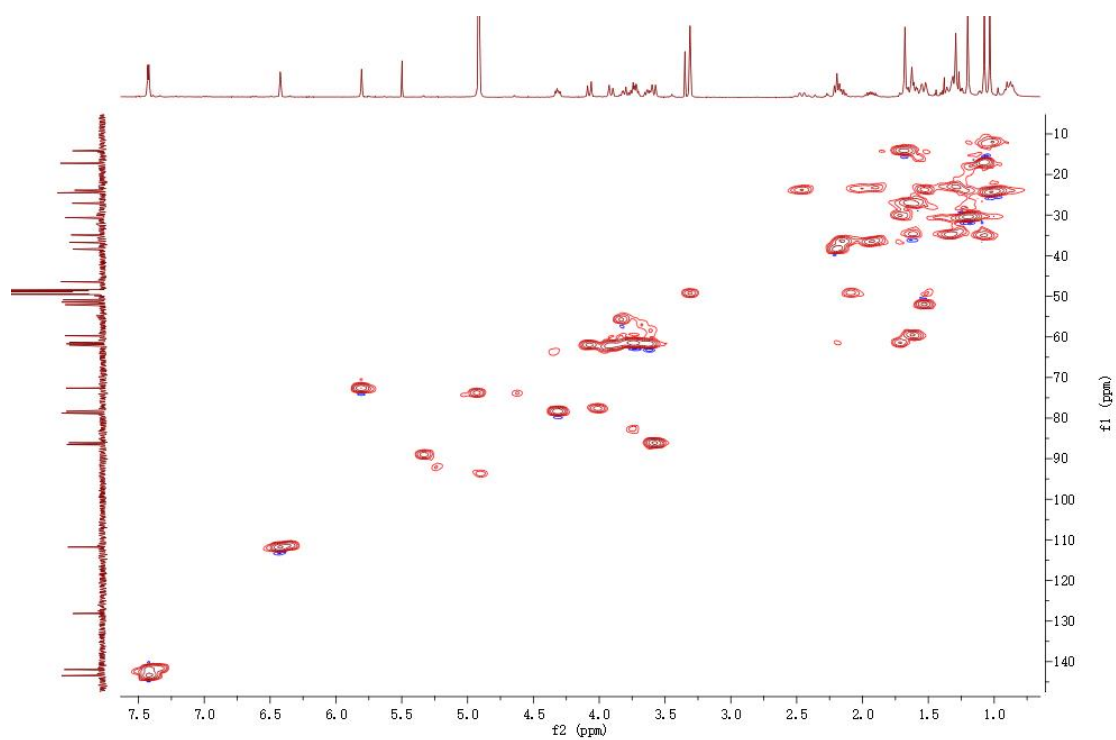

Figure S6: HSQC spectrum (500 MHz) of **3** in  $\text{CD}_3\text{OD}$ .

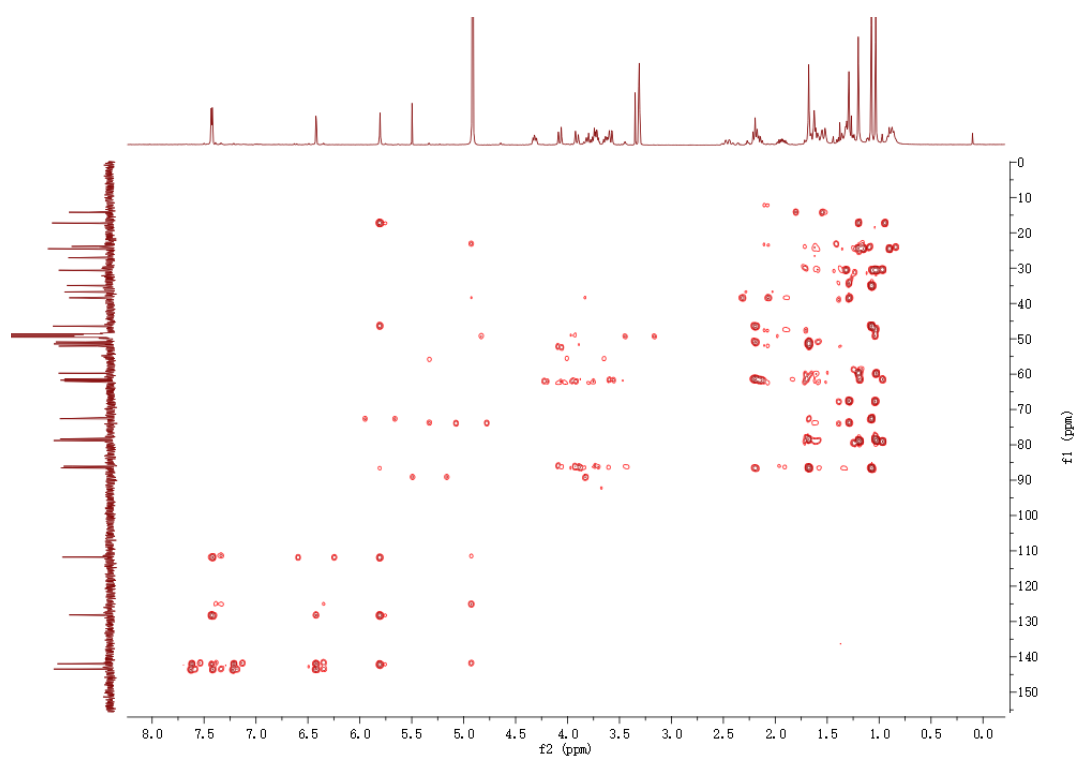

Figure S7: HMBC spectrum (500 MHz) of **3** in CD<sub>3</sub>OD.

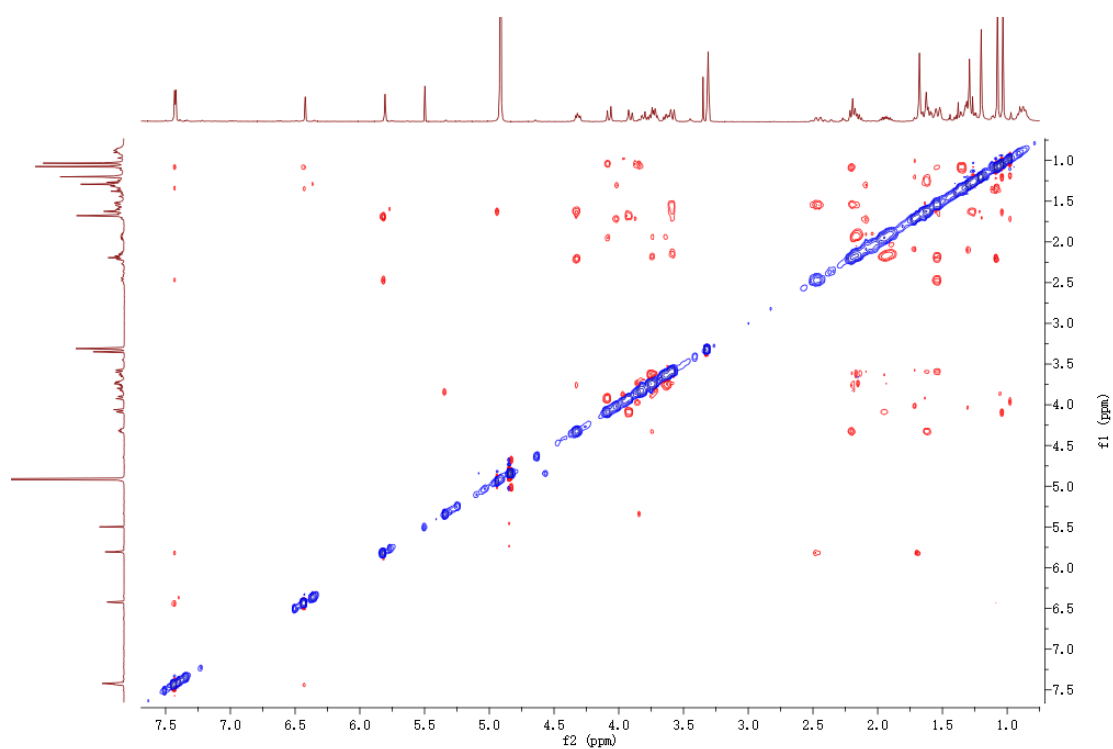

Figure S8: NOESY spectrum (500 MHz) of **3** in CD<sub>3</sub>OD.

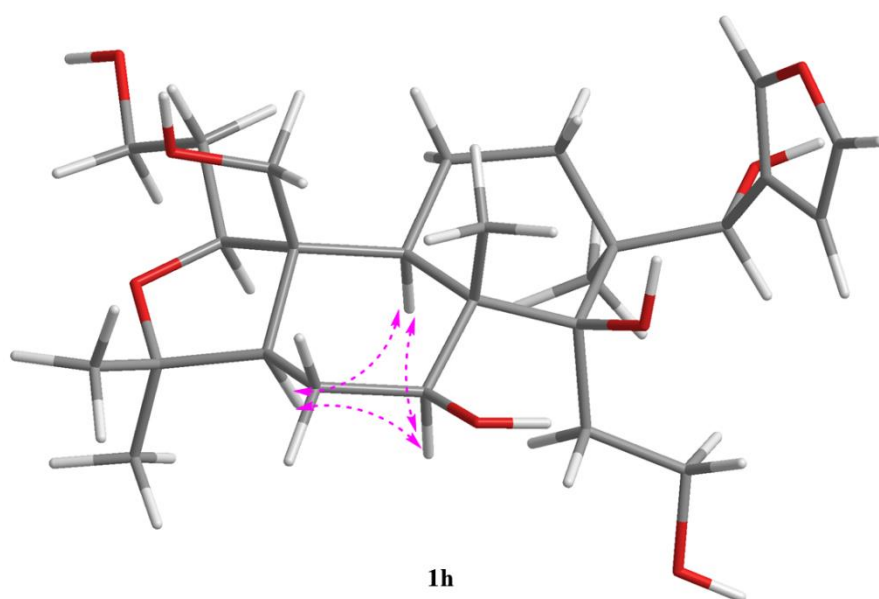

Figure S9: Key NOE correlations for compound **3**

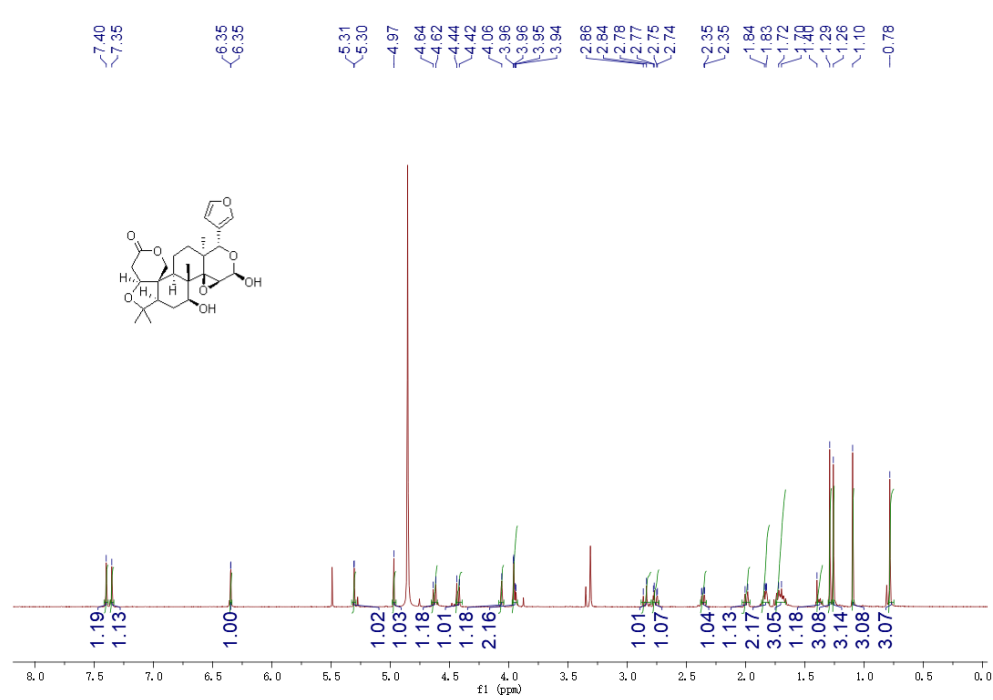

Figure S10:  $^1\text{H}$  NMR spectrum (400 MHz) of **4** in  $\text{CD}_3\text{OD}$

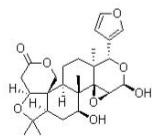

Figure S11:  $^{13}\text{C}$  NMR spectrum (125 MHz) of **4** in  $\text{CD}_3\text{OD}$

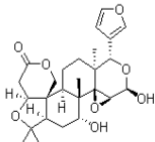

Figure S12:  $^1\text{H}$  NMR spectrum (400 MHz) of **5** in  $\text{CD}_3\text{OD}$ .

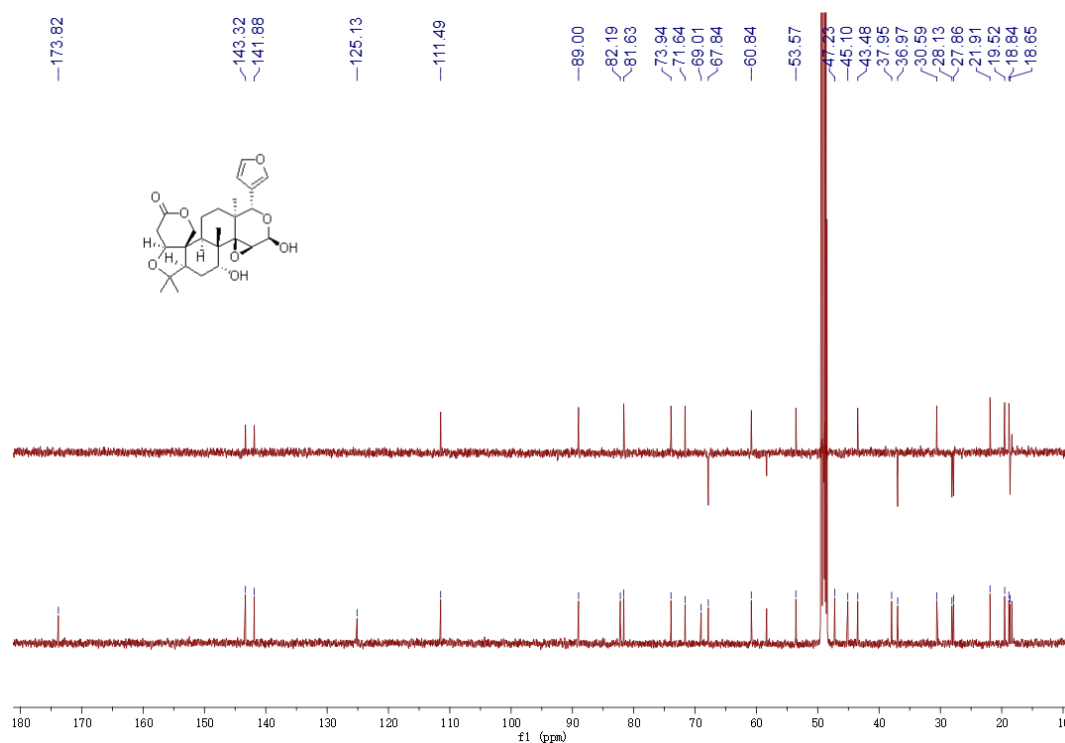

Figure S13:  $^{13}\text{C}$  NMR spectrum (125 MHz) of 5 in  $\text{CD}_3\text{OD}$ .

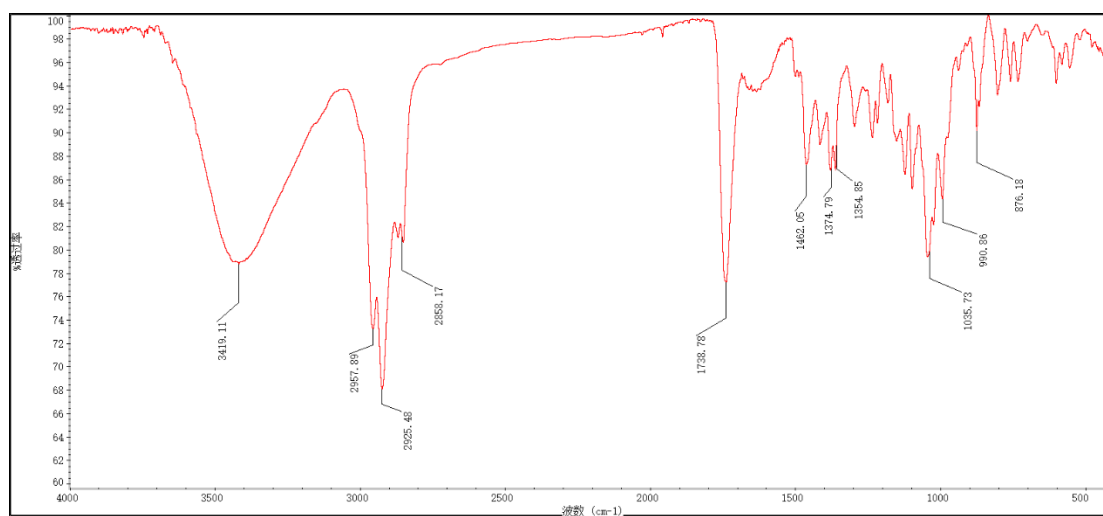

Figure S14: IR spectrum of compound 4



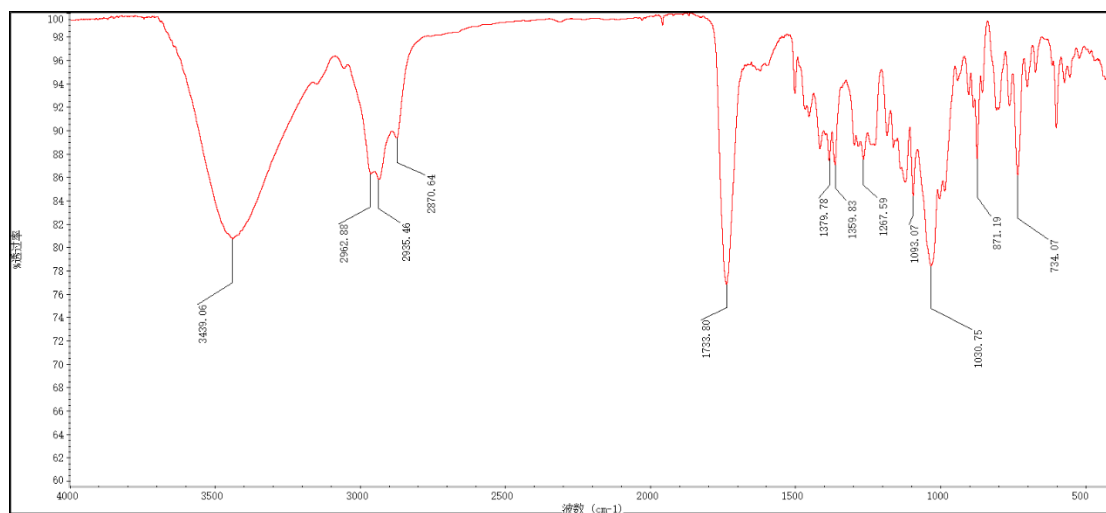

Figure S15: IR spectrum of compound **5**

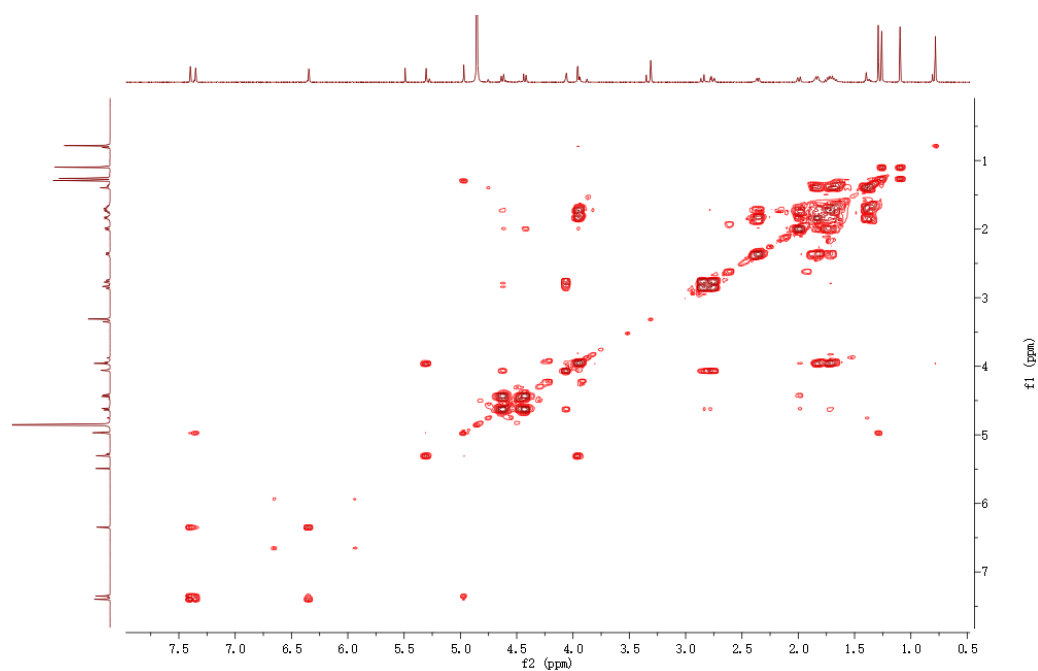

Figure S16:  $^1\text{H}$ - $^1\text{H}$  COSY spectrum (500 MHz) of **4** in  $\text{CD}_3\text{OD}$

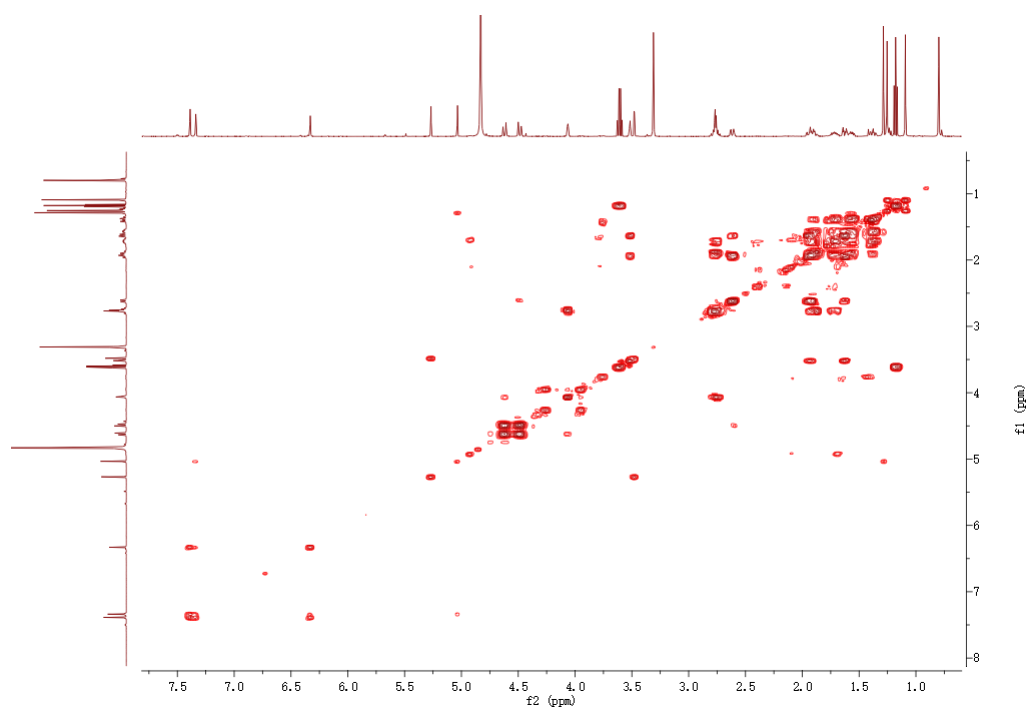

Figure S17:  $^1\text{H}$ – $^1\text{H}$  COSY spectrum (500 MHz) of **5** in  $\text{CD}_3\text{OD}$ .

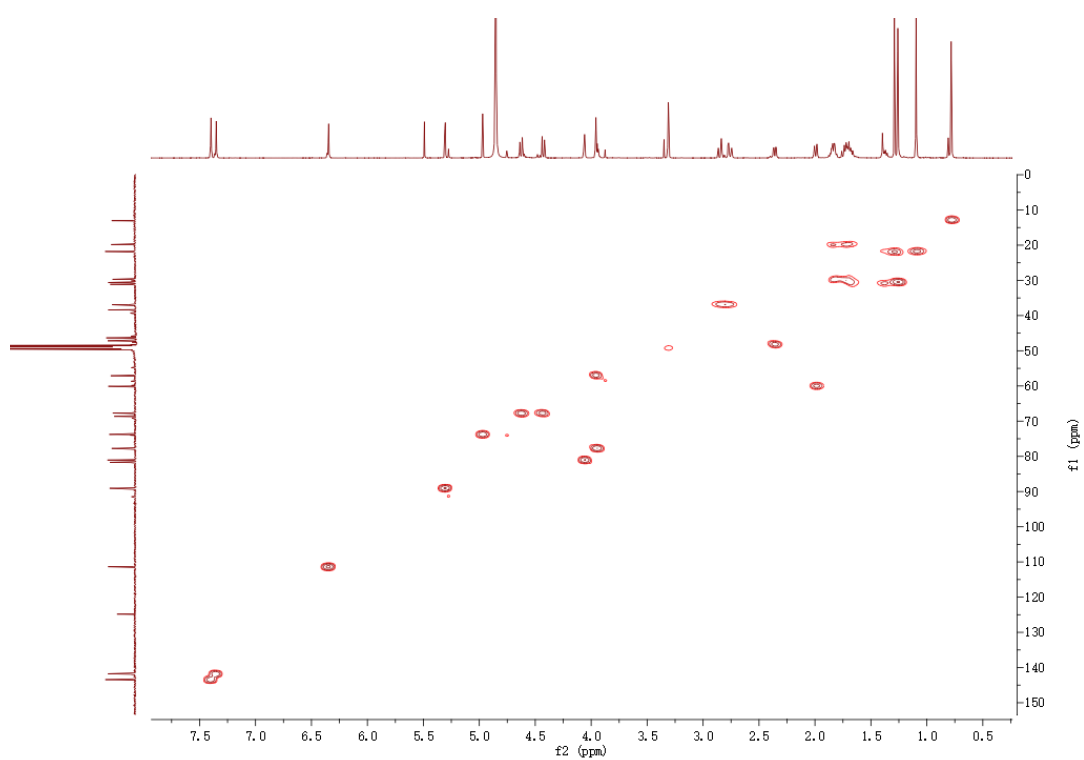

Figure S18: HSQC spectrum (500 MHz) of **4** in  $\text{CD}_3\text{OD}$

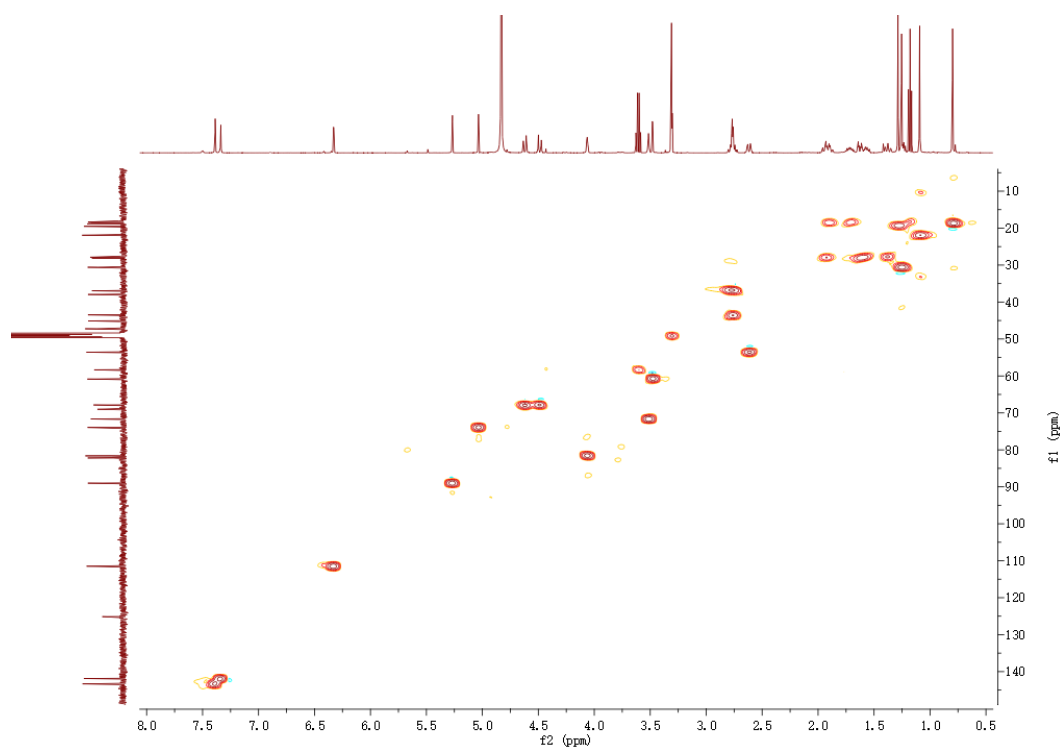

Figure S19: HSQC spectrum (500 MHz) of **5** in CD<sub>3</sub>OD.

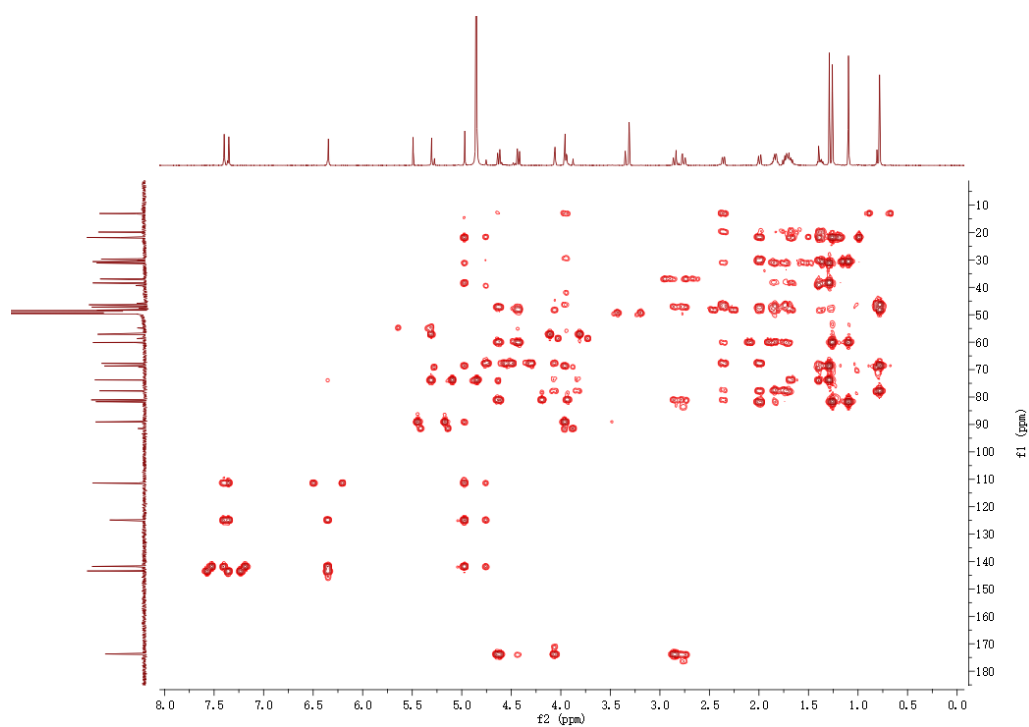

Figure S20: HMBC spectrum (500 MHz) of **4** in CD<sub>3</sub>OD

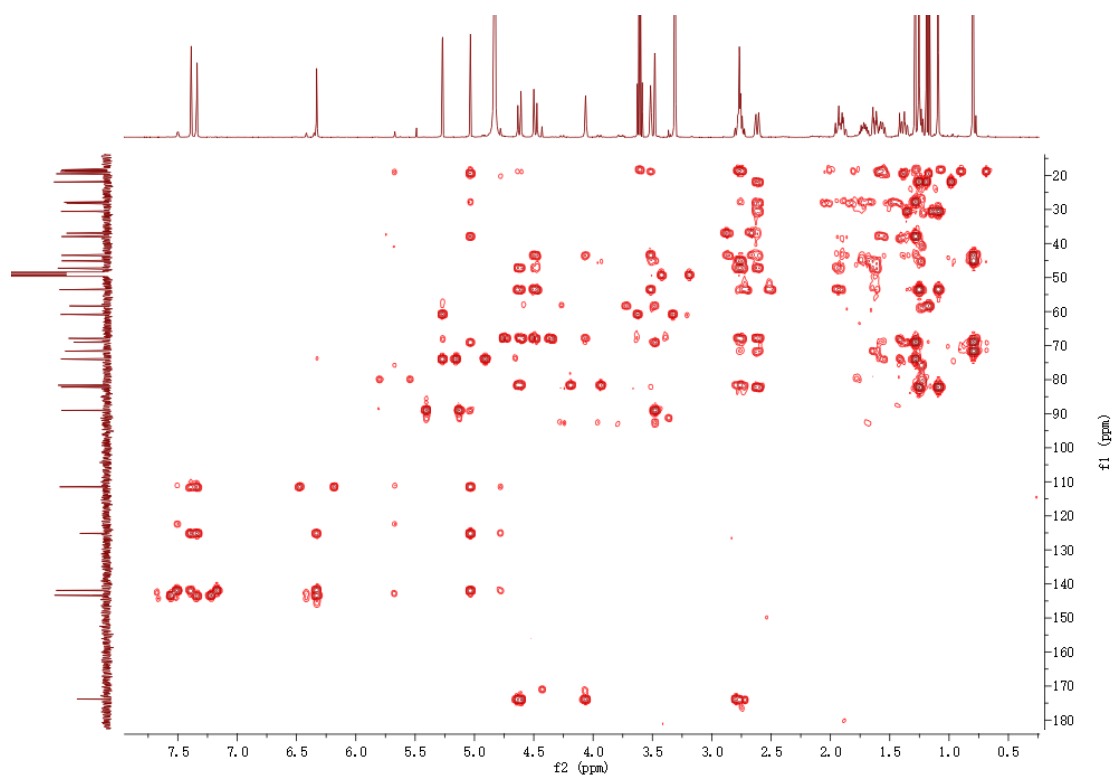

Figure S21: HMBC spectrum (500 MHz) of **5** in CD<sub>3</sub>OD.

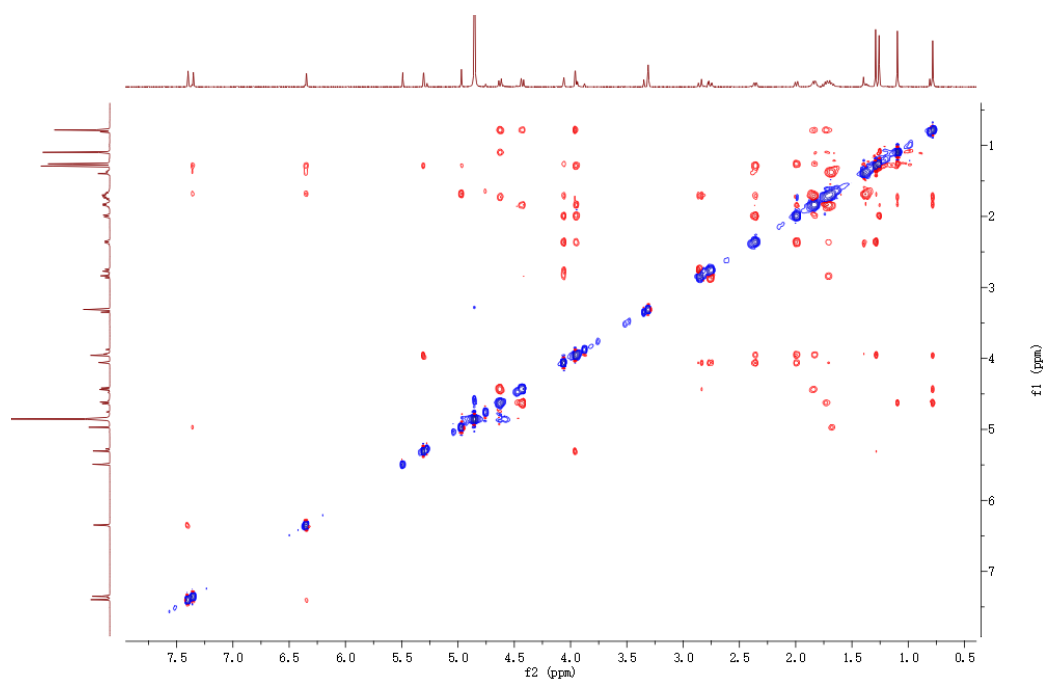

Figure S22: NOESY spectrum (500 MHz) of **4** in CD<sub>3</sub>OD

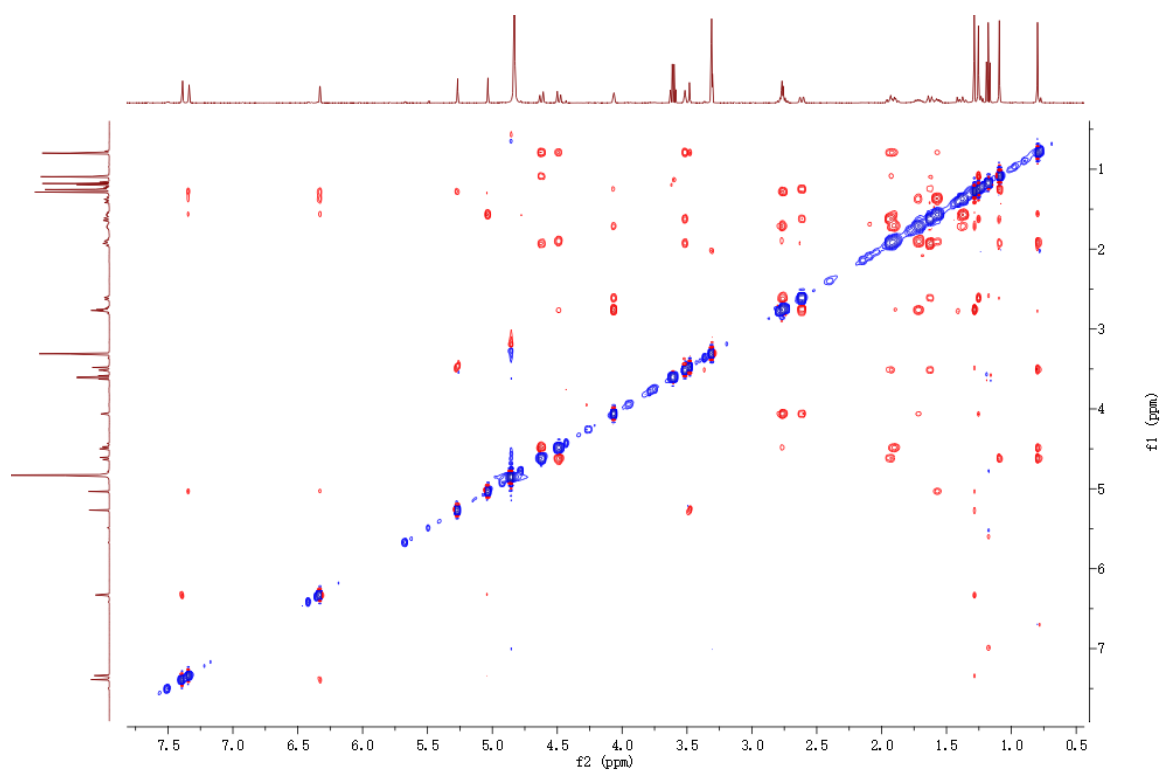

Figure S23: NOESY spectrum (500 MHz) of **5** in CD<sub>3</sub>OD..

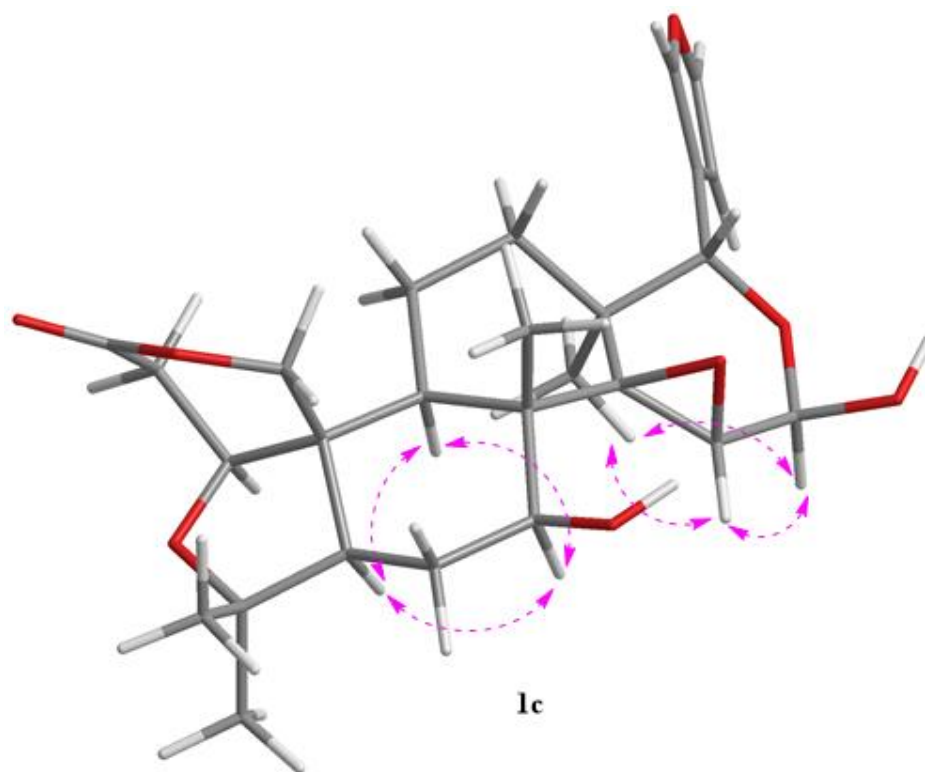

Figure S24: Key NOE correlations for compound **4**

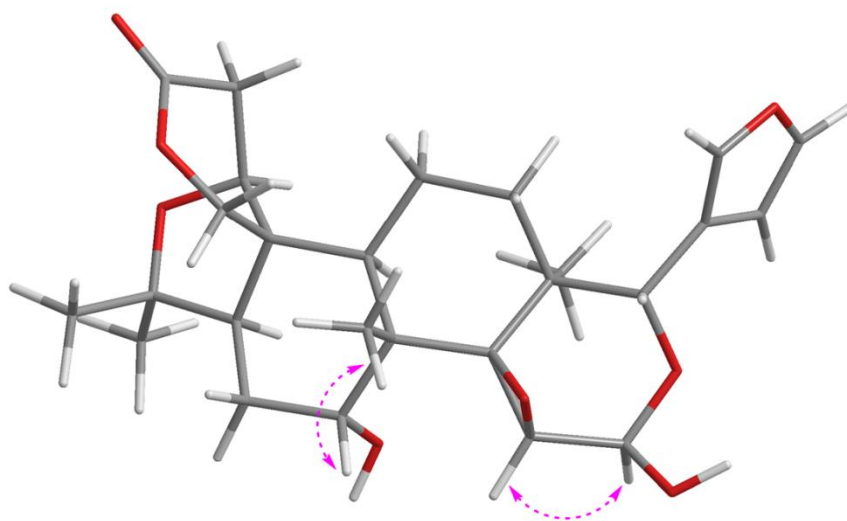

Figure S25: Key NOE correlations for compound **5**

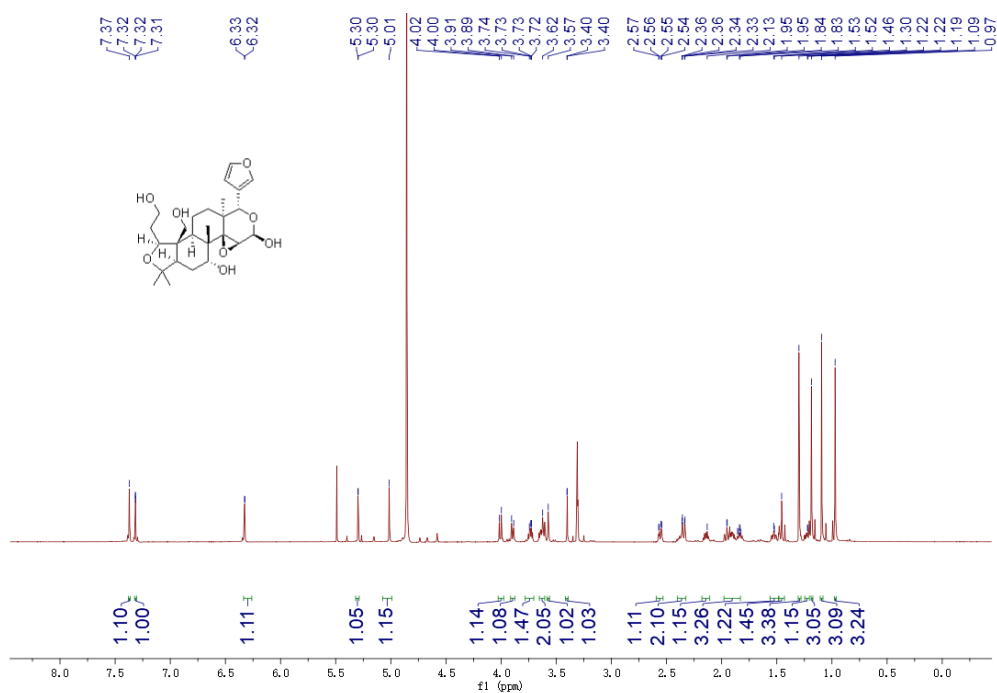

Figure S26:  $^1\text{H}$  NMR spectrum (400 MHz) of **6** in  $\text{CD}_3\text{OD}$ .

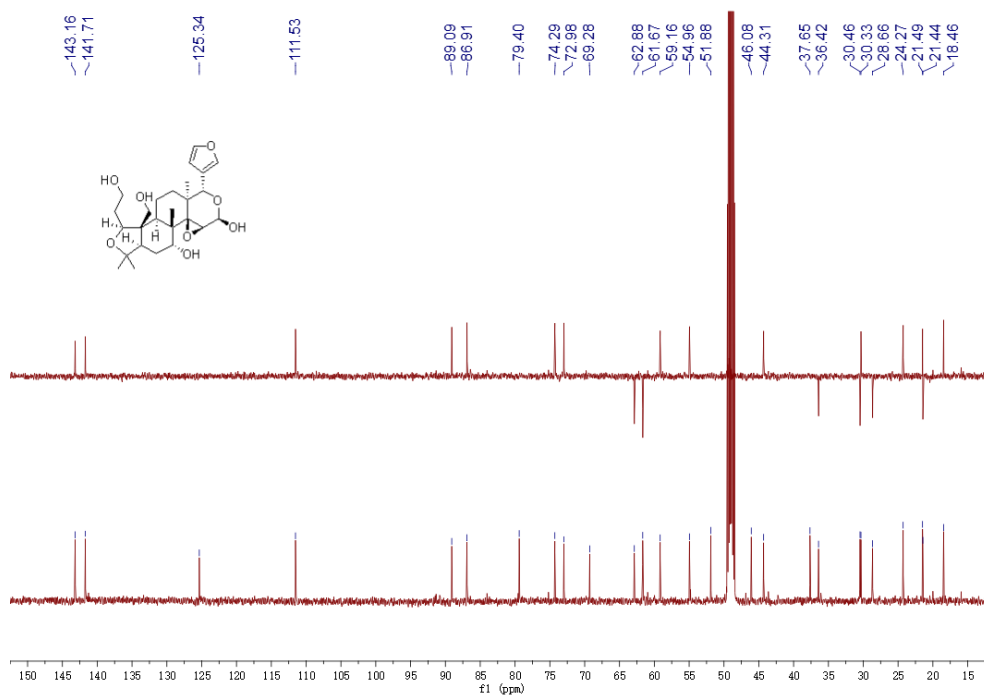

Figure S27: <sup>13</sup>C NMR spectrum (125 MHz) of 6 in CD<sub>3</sub>OD.

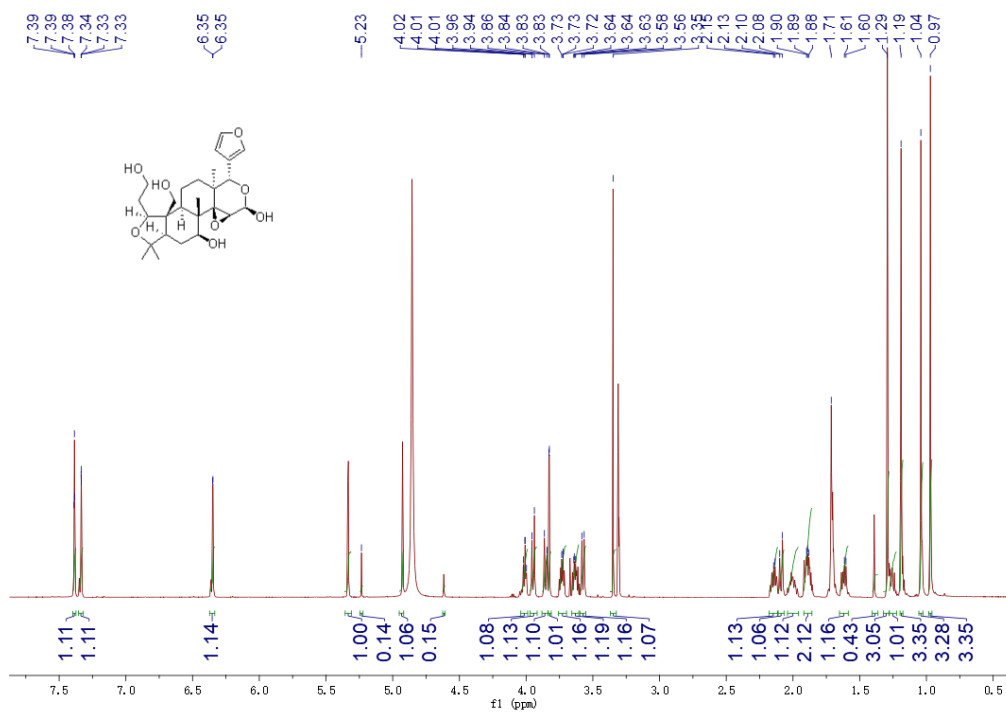

Figure S28: <sup>1</sup>H NMR spectrum (400 MHz) of 7 in CD<sub>3</sub>OD.

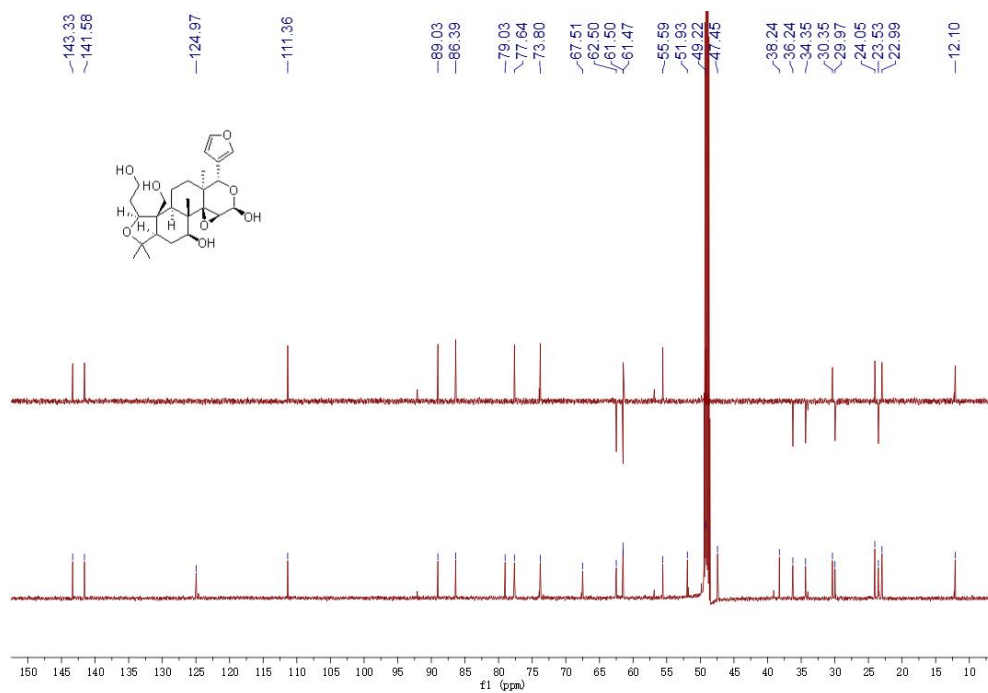

Figure S29: <sup>13</sup>C NMR spectrum (125 MHz) of 7 in CD<sub>3</sub>OD.

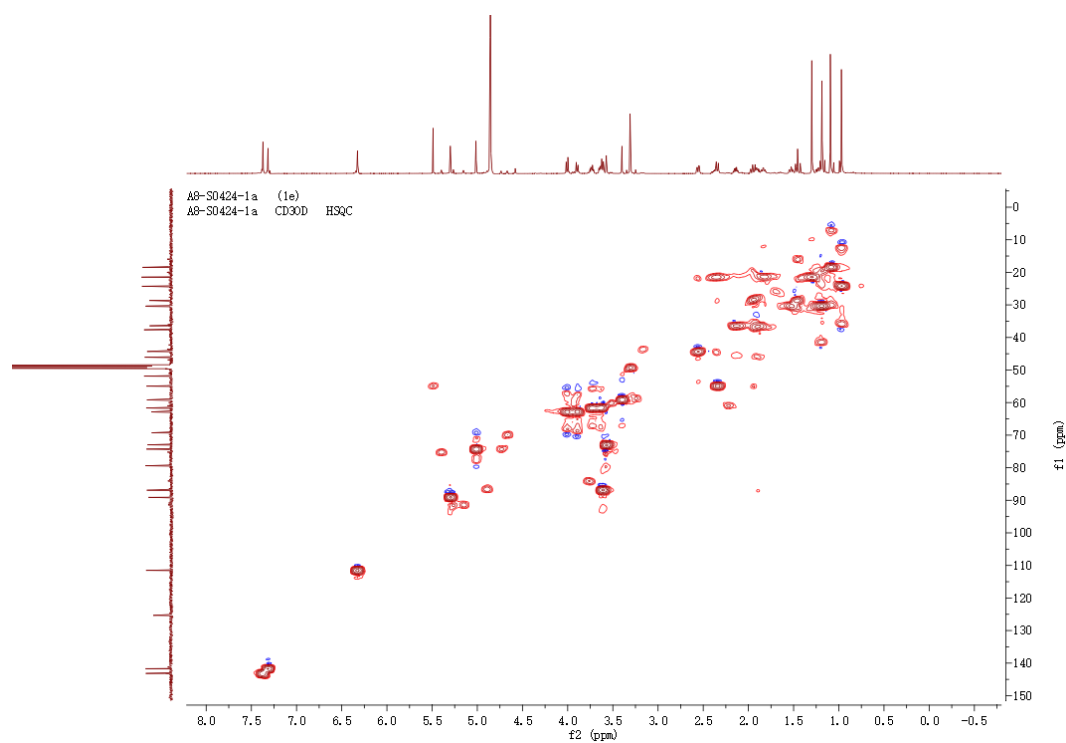

Figure S30: HSQC spectrum (500 MHz) of 6 in CD<sub>3</sub>OD.



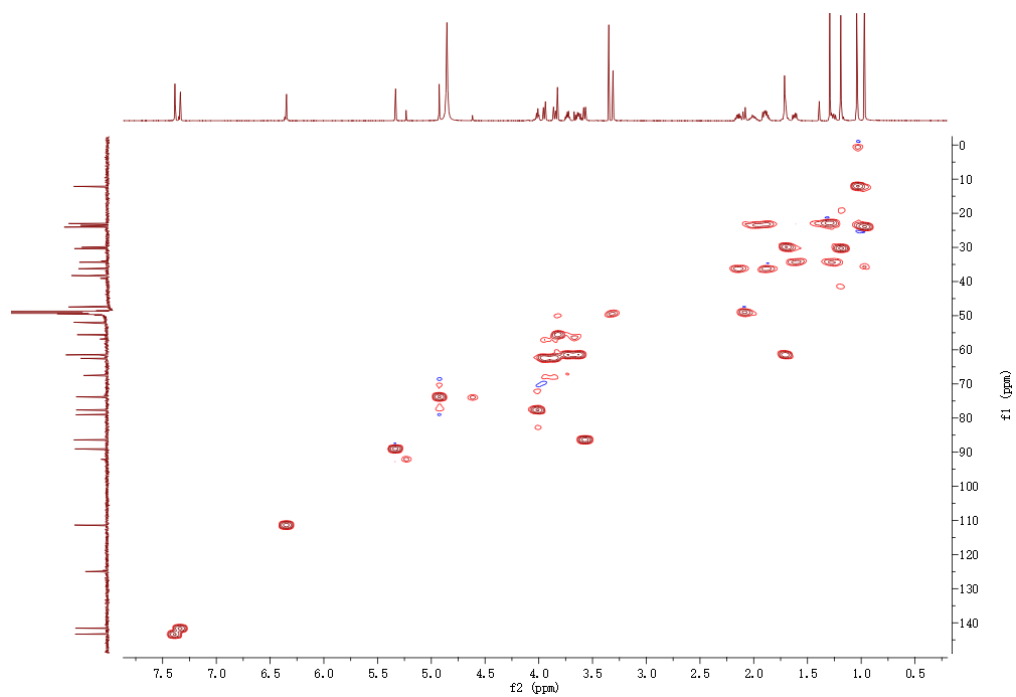

Figure S31: HSQC spectrum (500 MHz) of **7** in CD<sub>3</sub>OD.

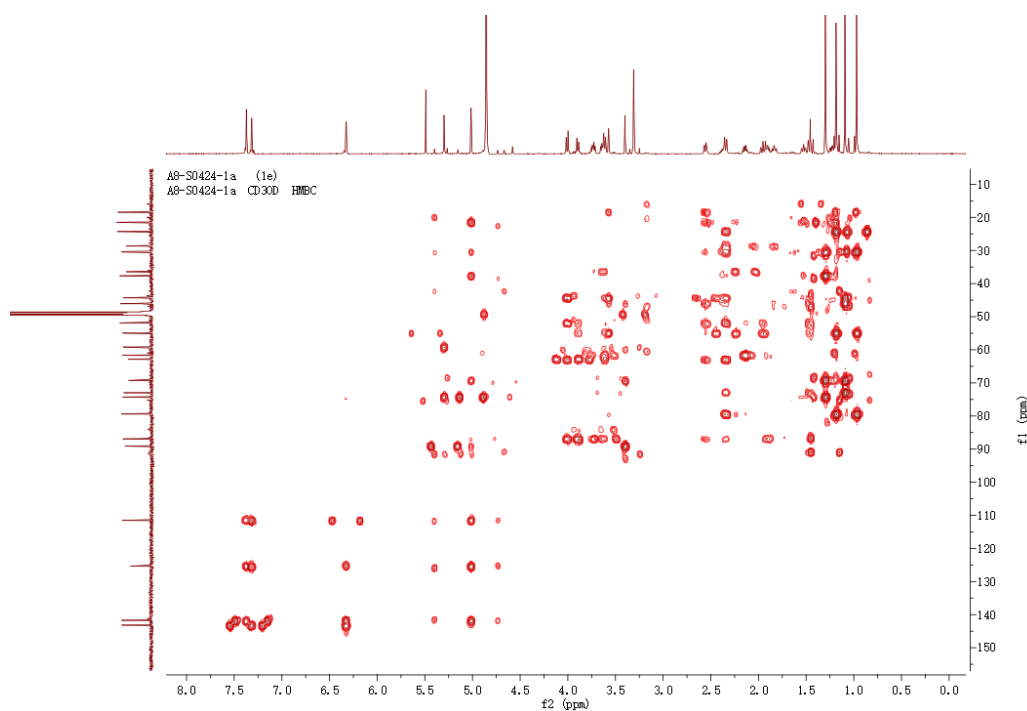

Figure S32: HMBC spectrum (500 MHz) of **6** in CD<sub>3</sub>OD.

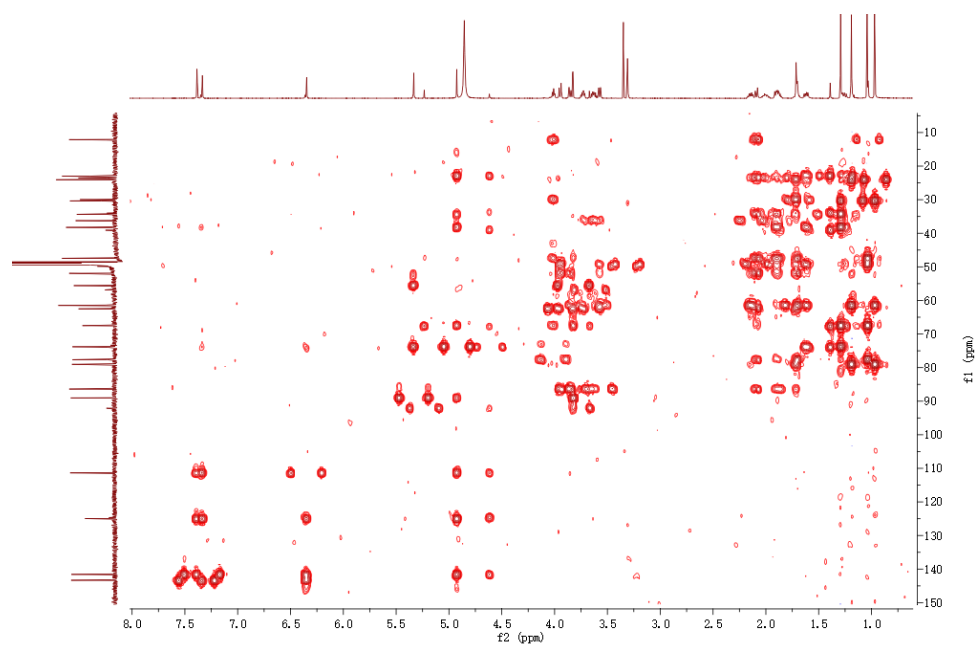

Figure S33: HMBC spectrum (500 MHz) of **7** in CD<sub>3</sub>OD.

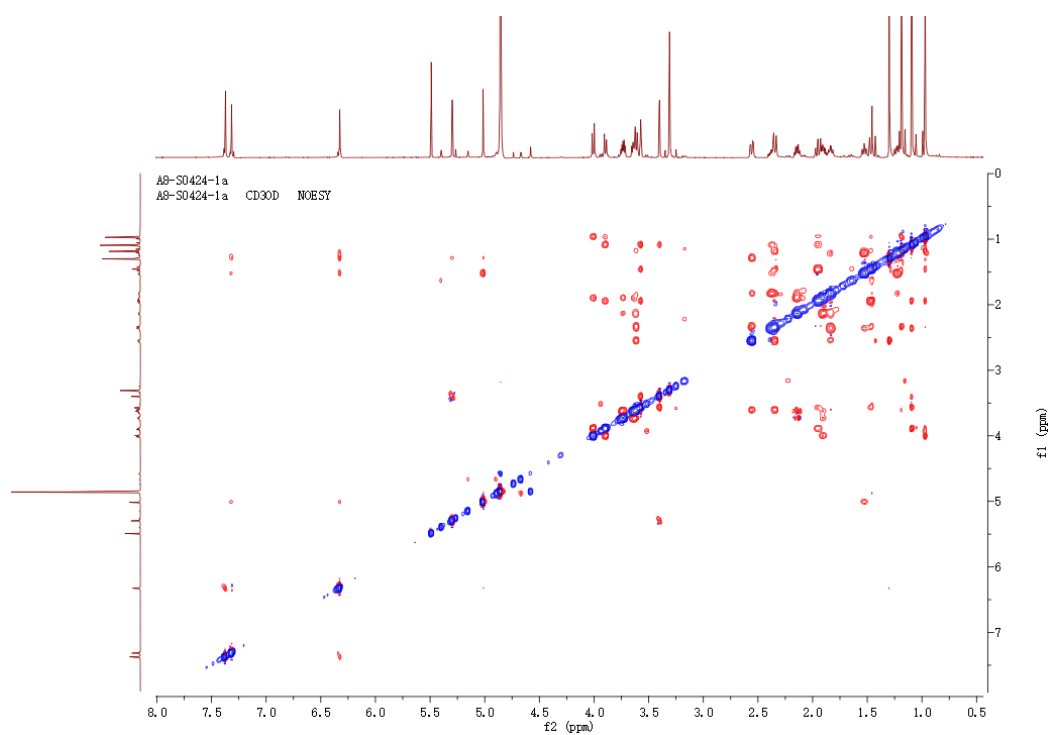

Figure S32: NOESY spectrum (500 MHz) of **6** in CD<sub>3</sub>OD.

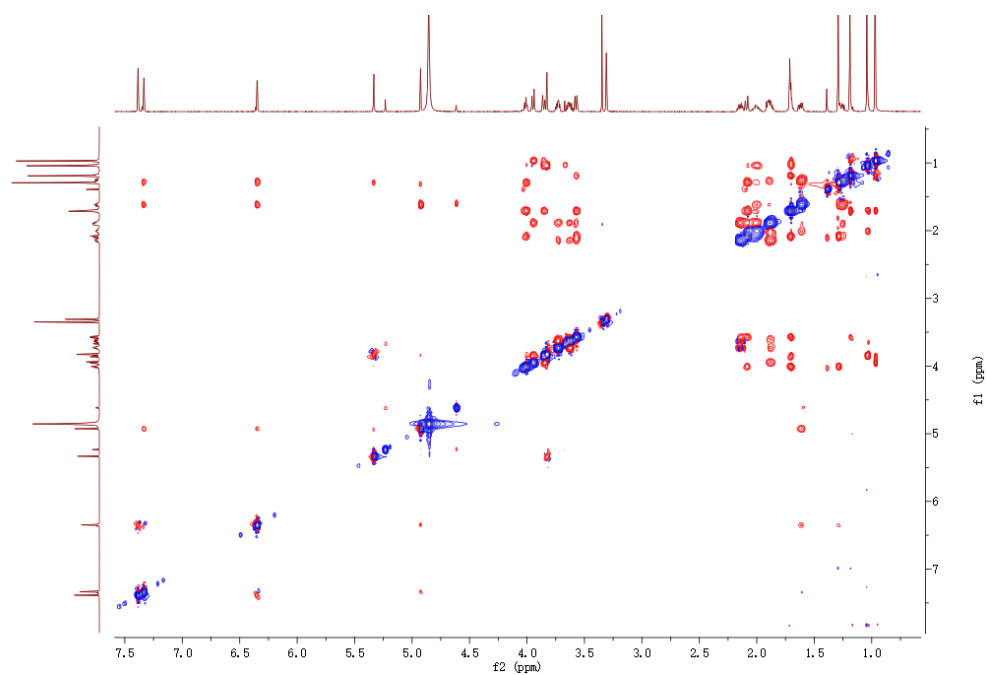

Figure S33: NOESY spectrum (500 MHz) of **7** in CD<sub>3</sub>OD..

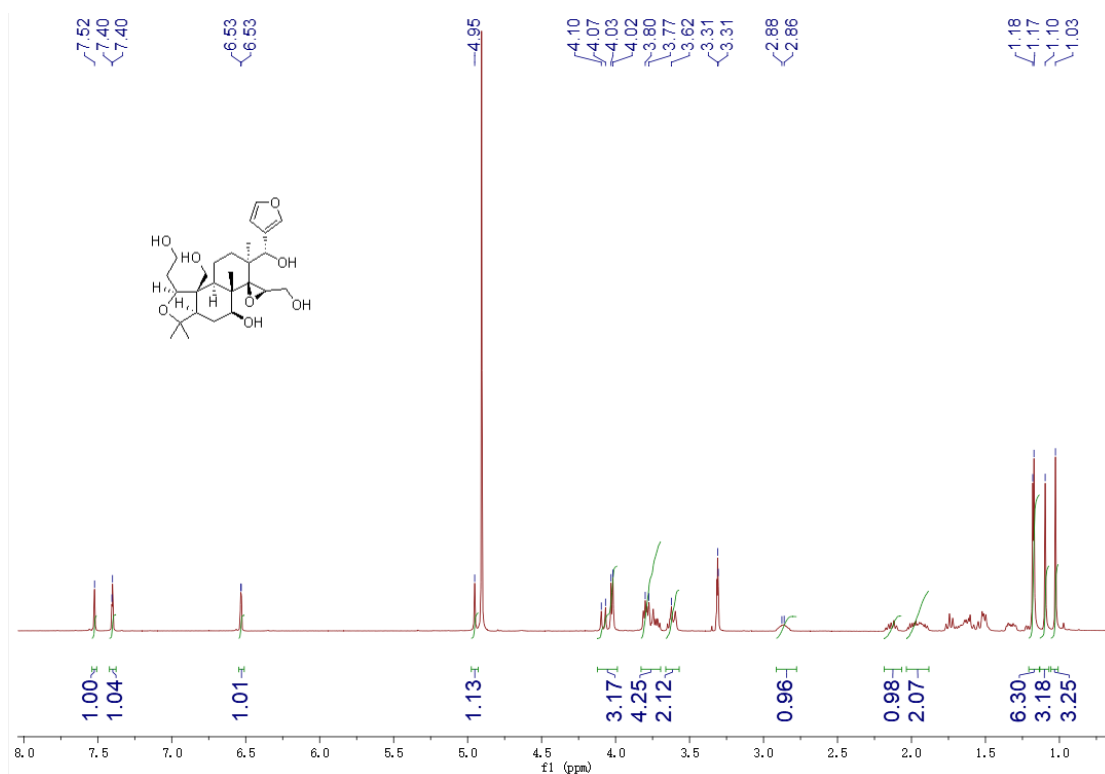

Figure S34: <sup>1</sup>H NMR spectrum (400 MHz) of **8** in CD<sub>3</sub>OD.

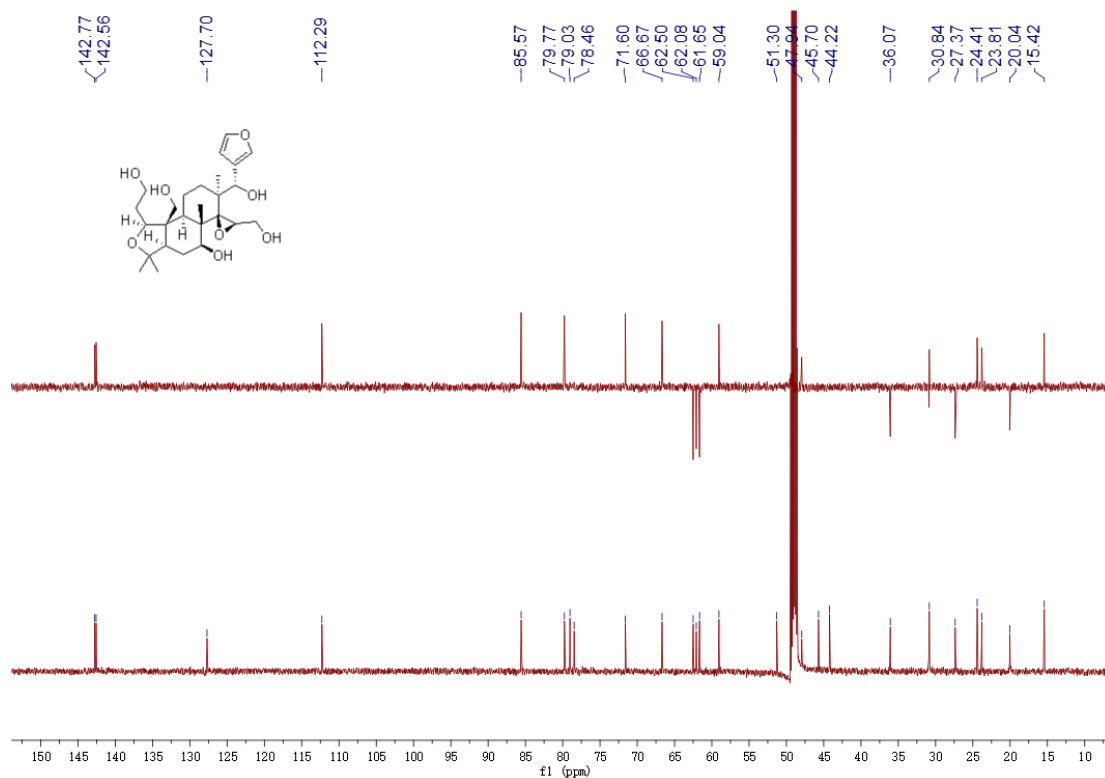

Figure S35:  $^{13}\text{C}$  NMR spectrum (125 MHz) of **8** in  $\text{CD}_3\text{OD}$ .

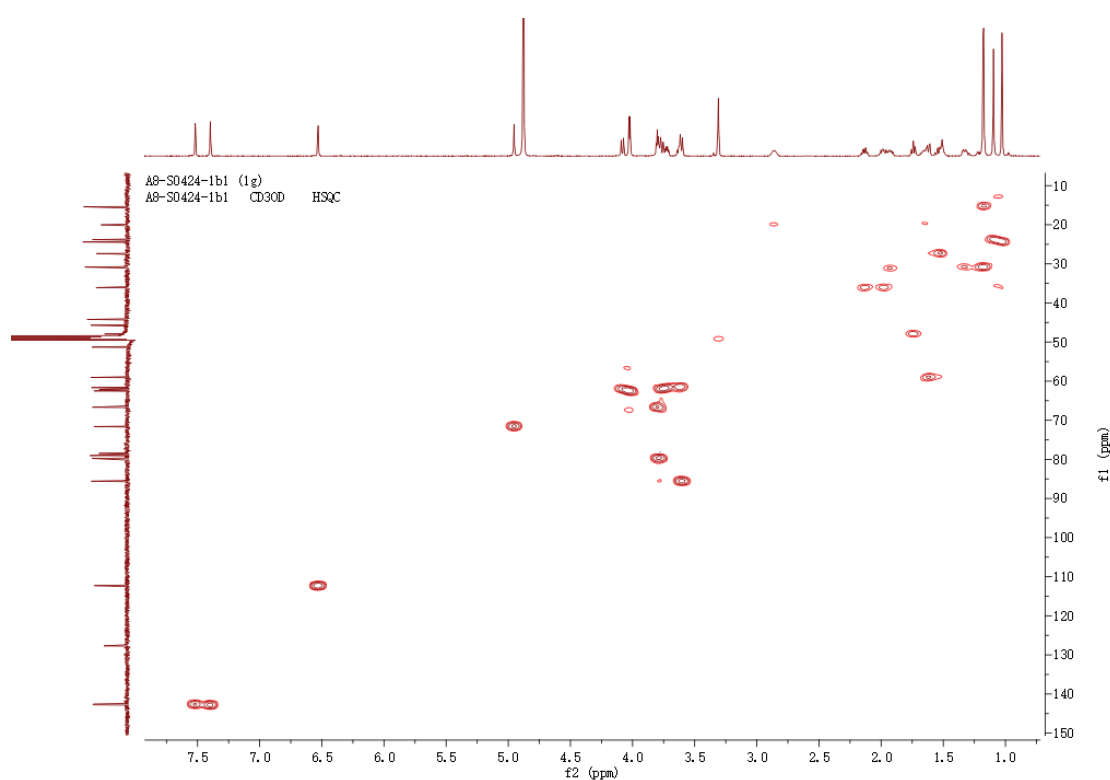

Figure S36: HSQC spectrum (500 MHz) of **8** in  $\text{CD}_3\text{OD}$ .

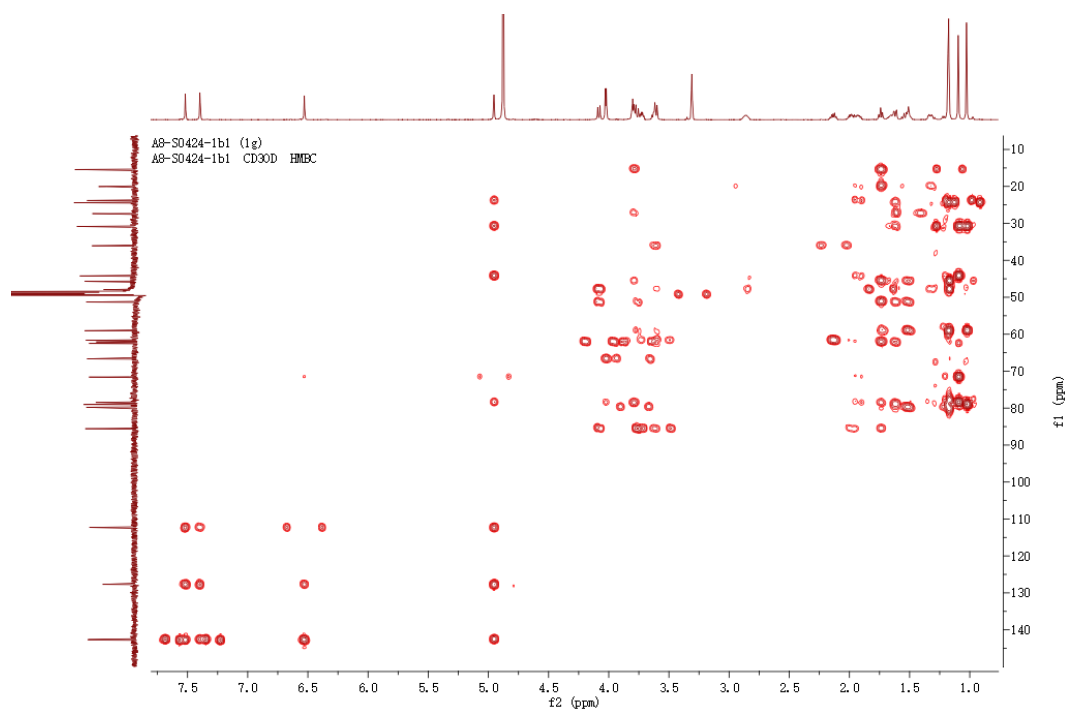

Figure S37: HMBC spectrum (500 MHz) of **8** in CD<sub>3</sub>OD.

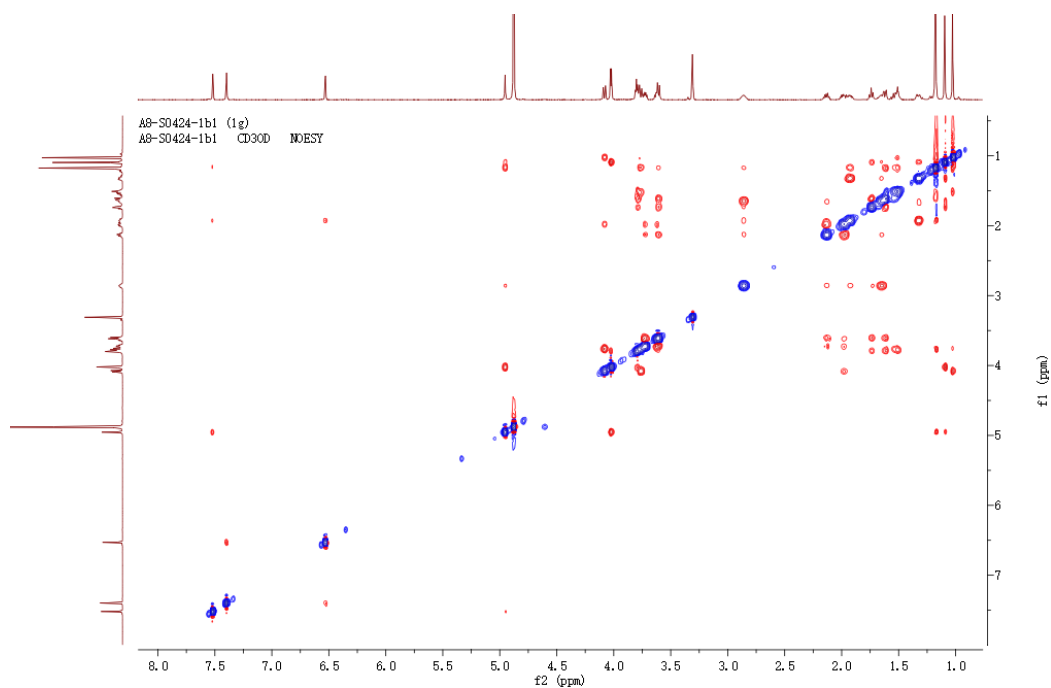

Figure S38: NOESY spectrum (500 MHz) of **8** in CD<sub>3</sub>OD.

## 2. Information of reagents used in the cell experiments

**Table S1 reagents used in the cell experiments**

| Reagents                                    | Company   | Supplier      |
|---------------------------------------------|-----------|---------------|
| Dulbeccos Modified Eagle Medium(high sugar) | /         | Gibco         |
| Fetal bovine serum (FBS)                    | 10 %      | Gibco         |
| Trypsin                                     | 0.25 %    | Gibco         |
| MTT                                         | 0.5 mg/ml | Sigma-Aldrich |
| DMSO                                        | 100%      | Sinopharm     |
| D-Hanks                                     | /         | Sinopharm     |
| LPS                                         | 100 ng/ml | Sigma-Aldrich |
| Griess reagent (modified)                   | /         | Sigma-Aldrich |
| Cell Counting Kit-8(CCK-8)                  | /         | Adamas Life   |
| Mouse TNF- $\alpha$ ELISA                   | /         | Adamas Life   |
